# Supplementary material for: Elegant Z-scheme-dictated g-C3N4 enwrapped WO3 superstructures: a multifarious platform for versatile photoredox catalysis
Source: Royal Society of Chemistry journal article supplement (doi:10.1039/c7ta04333c), 2017-01-01
Supplement: c7ta04333c1.pdf [file c7ta04333c1.pdf]

## ***Supporting Information***

# **Elegant Z-scheme-Dictated g-C<sub>3</sub>N<sub>4</sub> Enwrapped WO<sub>3</sub> Superstructures: A Multifarious Platform for Versatile Photoredox Catalysis**

Zhi-Yu Liang <sup>a,b</sup>, Jin-Xin Wei <sup>a,b</sup>, Xiu Wang <sup>a,b</sup>, Yan Yu <sup>a,b,\*</sup>, Fang-Xing Xiao <sup>a\*</sup>

<sup>a</sup>College of Materials Science and Engineering, Fuzhou University, New Campus, Minhou, Fujian  
Province 350108, China

<sup>b</sup>Key Laboratory of Eco-materials Advanced Technology (Fuzhou University), Fujian Province  
University, China

\*Corresponding author. Fax: +86 591 22866534;

E-mail address: yuyan@fzu.edu.cn  
fxxiao@fzu.edu.cn

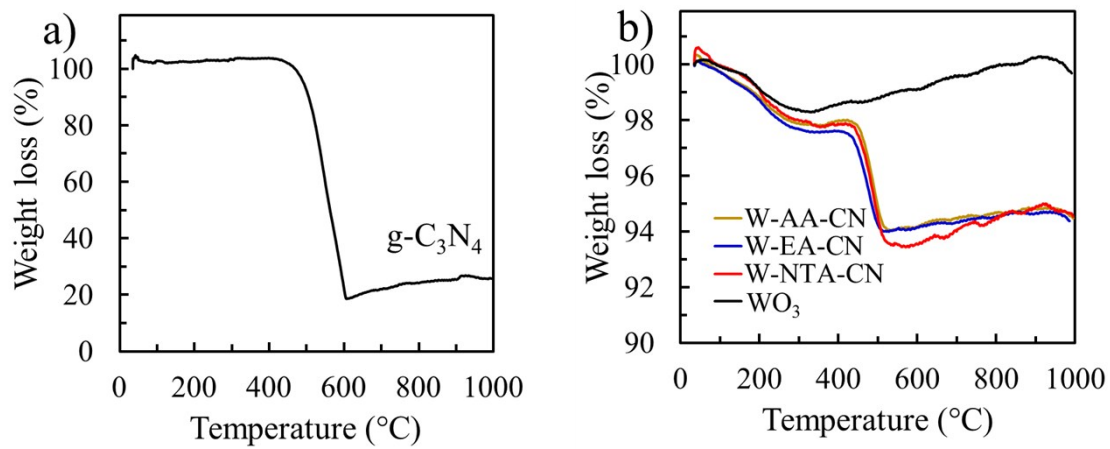

**Fig. S1.** TGA results of (a) g-C<sub>3</sub>N<sub>4</sub> and (b) W-AA-CN, W-EA-CN, W-NTA-CN, WO<sub>3</sub>.

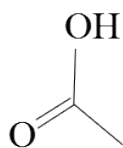

acetic acid

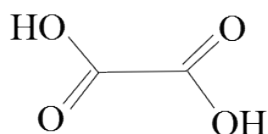

ethanedioic acid

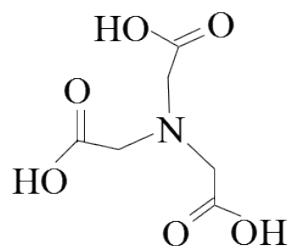

nitrilotriacetic acid

**Fig. S2.** Molecular structures of acetic acid (AA), ethanedioic acid (EA) and nitrilotriacetic acid (NTA) used for the synthesis of different  $\text{WO}_3$  superstructures.

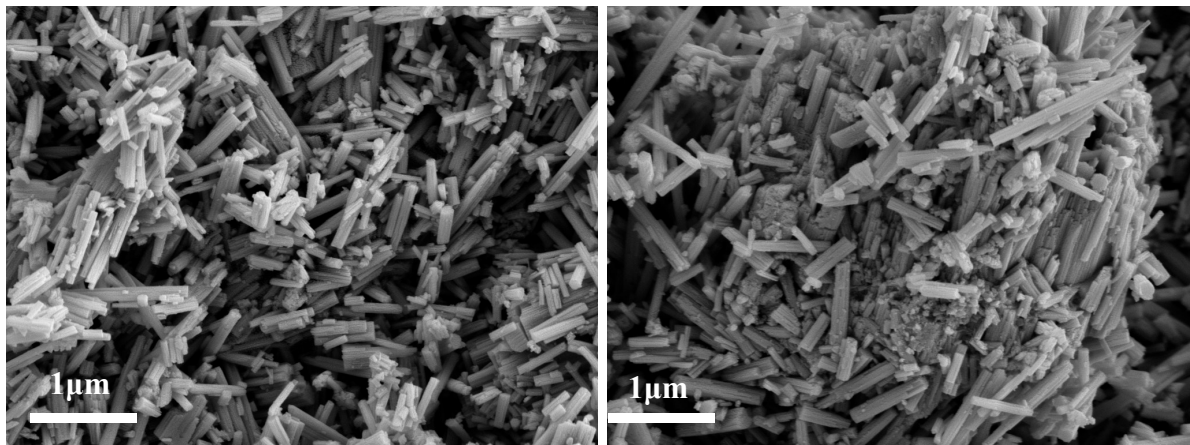

**Fig. S3.** FESEM images of  $\text{WO}_3$  prepared without using organic acids.

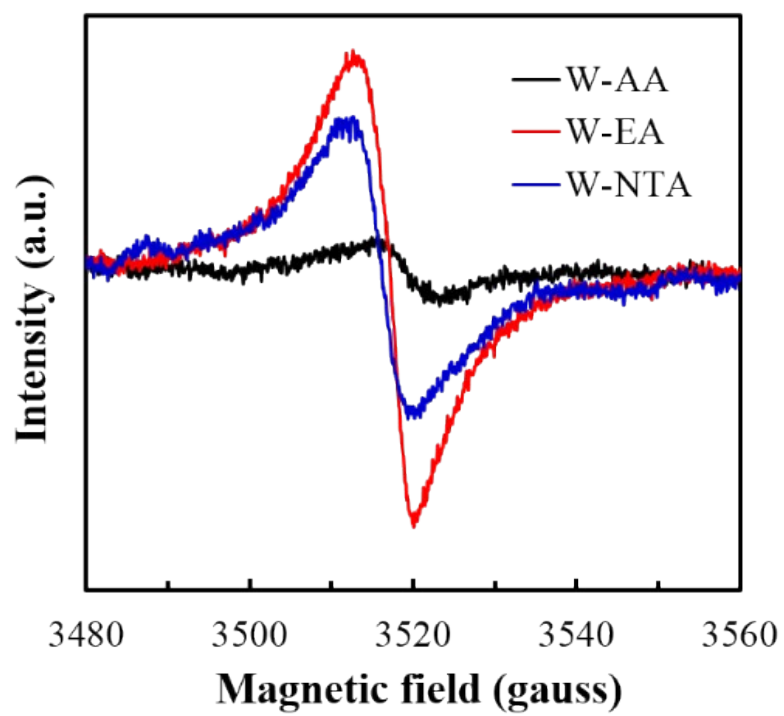

**Fig. S4.** ESR spectra of oxygen vacancy for W-AA, W-EA and W-NTA.

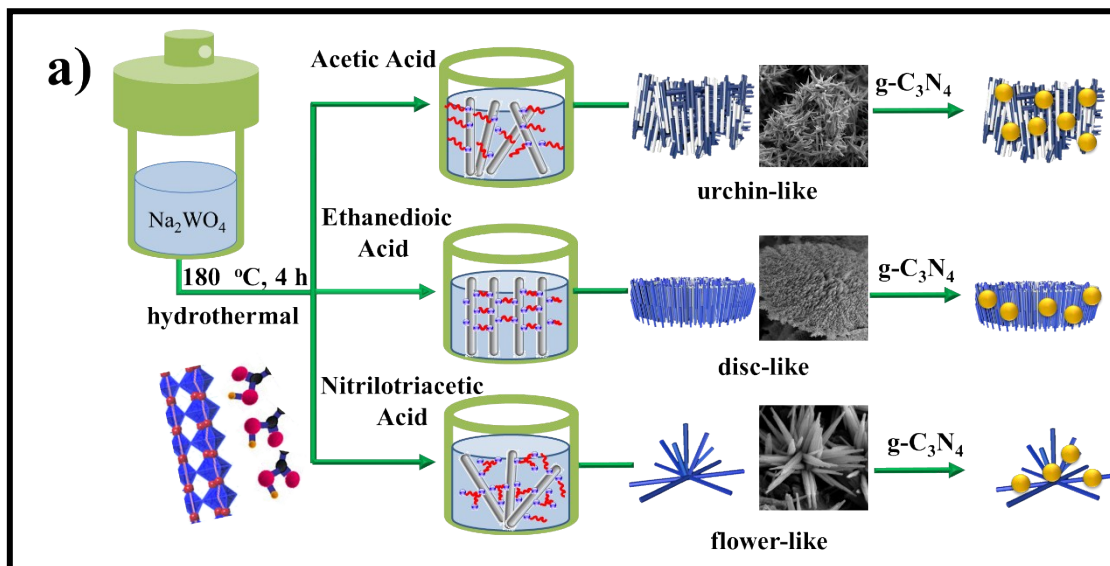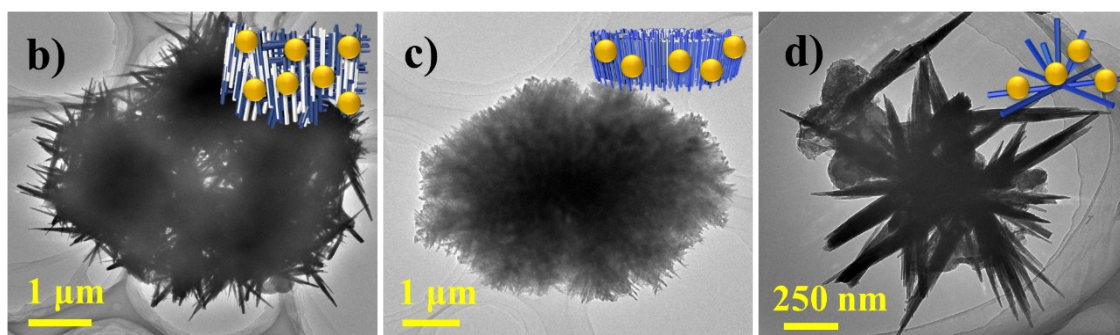

**Fig. S5.** (a) Possible growth mechanism of  $\text{WO}_3$  superstructures induced by organic acids. TEM images of (b) W-AA-CN, (c) W-EA-CN and (d) W-NTA-CN heterostructures.

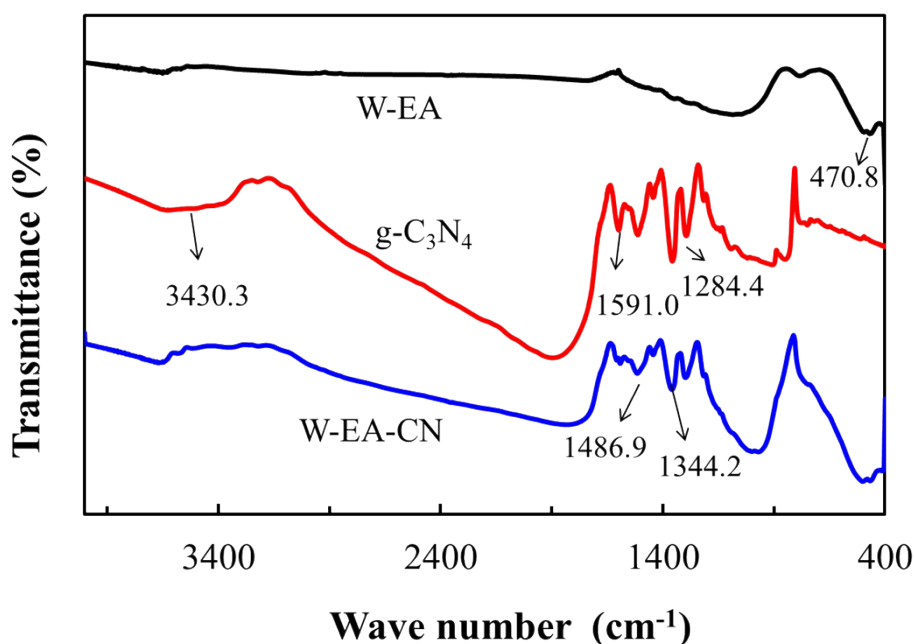

**Fig. S6.** FTIR spectra of W-EA, g-C<sub>3</sub>N<sub>4</sub>, and W-EA-CN.

**Note:** Fig. S6 shows the FTIR spectra of W-EA, g-C<sub>3</sub>N<sub>4</sub> and W-EA-CN. The FTIR spectra of W-EA and W-EA-CN illustrate the characteristic absorption bands at 450–760 cm<sup>-1</sup>, which are attributed to the W-O stretching and W-O-W bridging stretching modes<sup>1,2</sup>. FTIR spectrum of g-C<sub>3</sub>N<sub>4</sub> is featured by the presence of several peaks located between 1200 and 1650 cm<sup>-1</sup>, which can be assigned to the stretching vibration mode of aromatic C-N heterocycles containing either trigonal N(-C)<sub>3</sub> or bridging C-NH-C units, indicating the formation of C-N-C bonds<sup>3,4</sup>. Additionally, a broad band at around 3430 cm<sup>-1</sup> was clearly seen in the FTIR spectrum of g-C<sub>3</sub>N<sub>4</sub>, indicative of the stretching vibration mode of N-H groups<sup>5,6</sup>. Noteworthy, all characteristic peaks of g-C<sub>3</sub>N<sub>4</sub> can be clearly observed in the FTIR spectrum of W-EA-CN, verifying successful attachment of g-C<sub>3</sub>N<sub>4</sub> on the WO<sub>3</sub> framework.

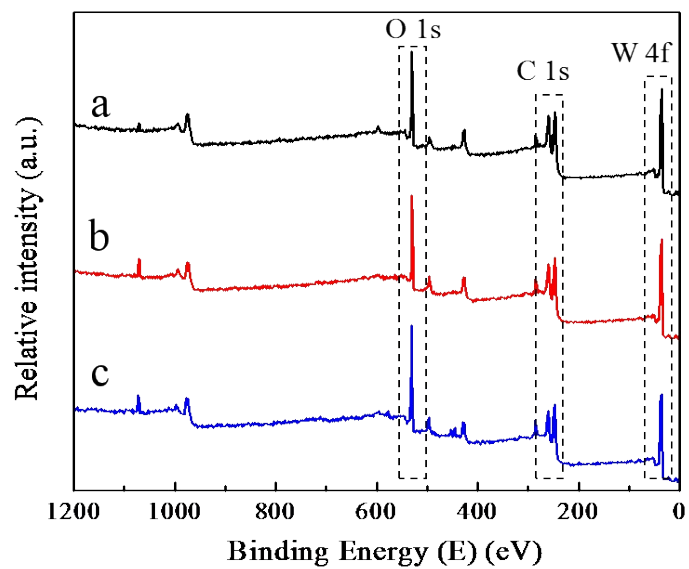

**Fig. S7.** Survey XPS spectra of (a) W-AA, (b) W-EA and (c) W-NTA.



**Tab. S1.**  $E_g$ ,  $E_{CB}$  and  $E_{VB}$  of  $WO_3$  and  $g-C_3N_4$  in blank sample and heterostructures.

|              | $E_g$ /eV | $E_{VB}$ /eV | $E_{CB}$ /eV |
|--------------|-----------|--------------|--------------|
| W-AA         | 2.75      | +3.37        | +0.62        |
| W-EA         | 2.56      | +3.27        | +0.71        |
| W-NTA        | 2.67      | +3.33        | +0.66        |
| $g-C_3N_4$   | 2.68      | +1.57        | -1.11        |
| W-AA-CN      | 2.70      | -            | -            |
| W-EA-CN      | 2.61      | -            | -            |
| W-NTA-<br>CN | 2.66      | -            | -            |

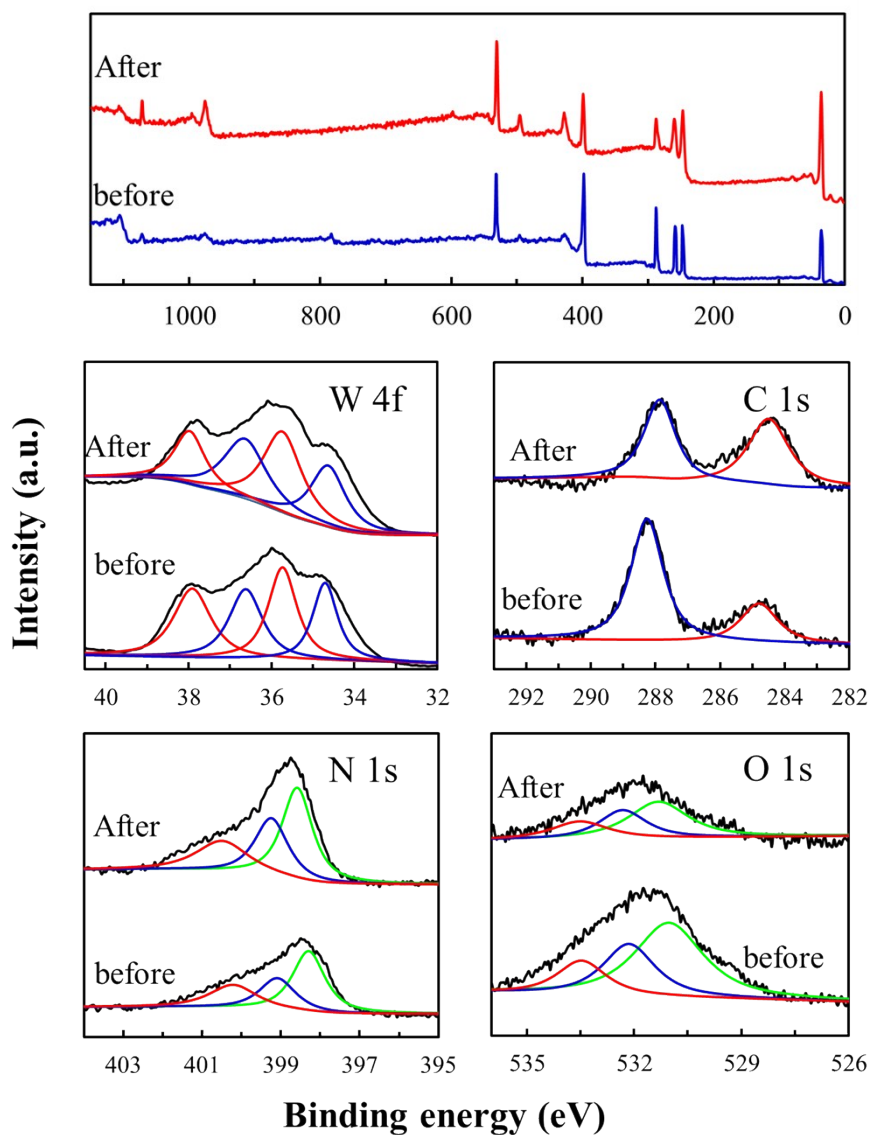

**Fig. S8.** Survey and high-resolution XPS spectra of W-EA-CN heterostructure before and after five successive cyclic photocatalytic reactions.

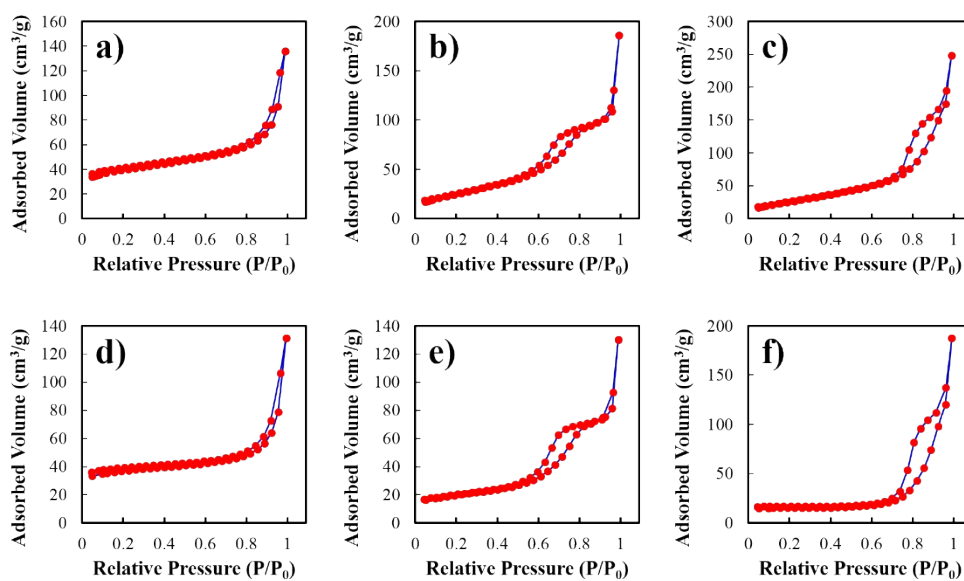

**Fig. S9.** Specific surface areas of (a) W-AA, (b) W-EA, (c) W-NTA, (d) W-AA-CN, (e) W-EA-CN and (f) W-NTA-CN heterostructures.

**Tab. S2.** Specific surface area, pore volume and pore size of different samples.

|          | BET surface area<br>(m <sup>2</sup> /g) | Pore<br>volume<br>(cm <sup>3</sup> /g) | Pore size<br>(nm) |
|----------|-----------------------------------------|----------------------------------------|-------------------|
| W-AA     | 97.5                                    | 0.385                                  | 6.2               |
| W-AA-CN  | 44.2                                    | 0.291                                  | 10.3              |
| W-EA     | 128.9                                   | 0.200                                  | 5.3               |
| W-EA-CN  | 65.6                                    | 0.175                                  | 8.4               |
| W-NTA    | 167.6                                   | 0.488                                  | 10.4              |
| W-NTA-CN | 112.7                                   | 0.154                                  | 11.2              |

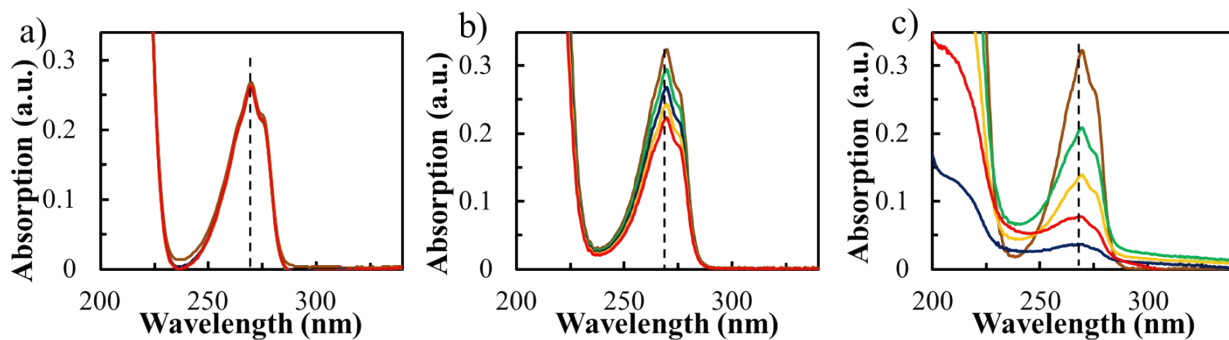

**Fig. S10.** UV-vis spectra of phenol (270 nm) degraded by (a) W-EA, (b) g-C<sub>3</sub>N<sub>4</sub> and W-EA-CN.

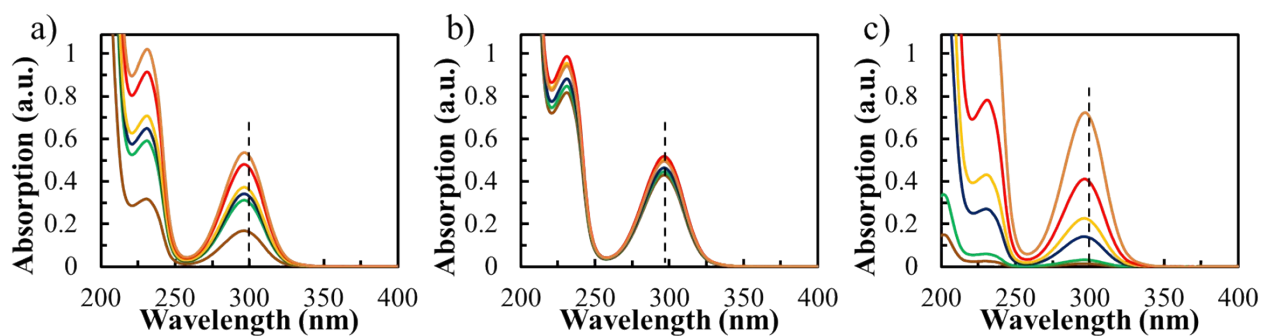

**Fig. S11.** UV-vis spectra of salicylic acid (300 nm) degraded by (a) W-EA, (b) g-C<sub>3</sub>N<sub>4</sub> and W-EA-CN.

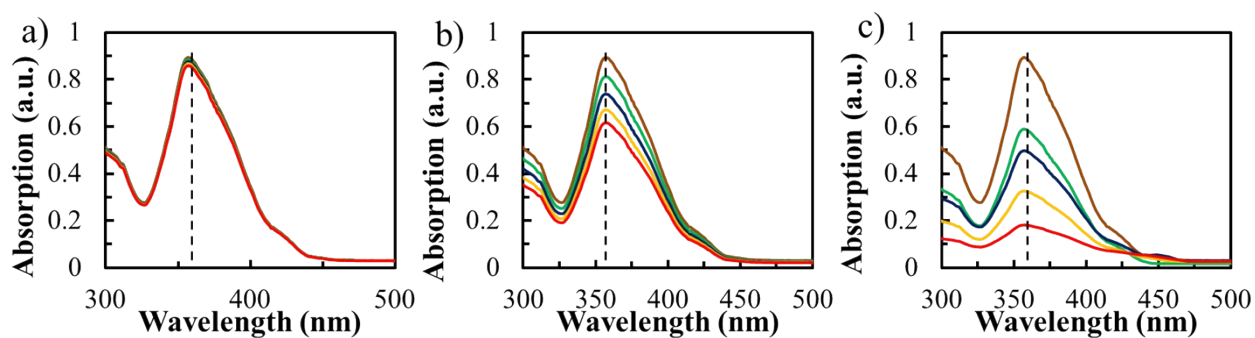

**Fig. S12.** UV-vis spectra of Cr(VI) (364 nm) degraded by (a) W-EA, (b) g-C<sub>3</sub>N<sub>4</sub> and W-EA-CN.

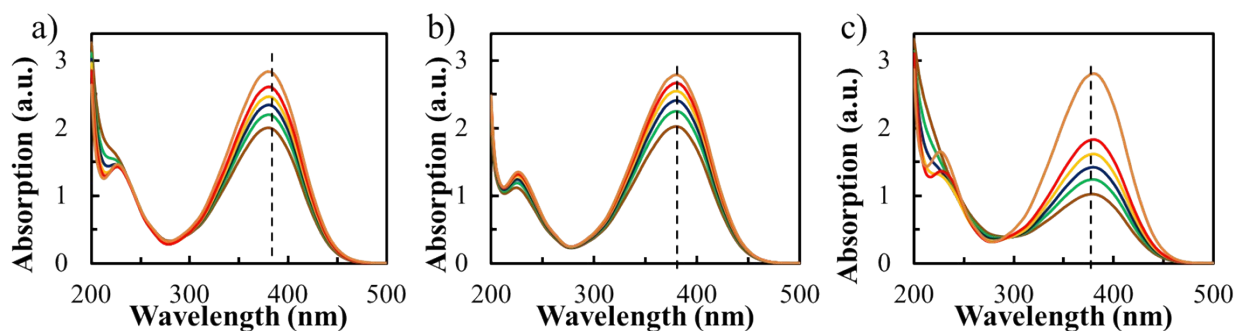

**Fig. S13.** UV-vis spectra of 4-nitroaniline (380 nm) degraded by (a) W-EA, (b) g-C<sub>3</sub>N<sub>4</sub> and W-EA-CN.

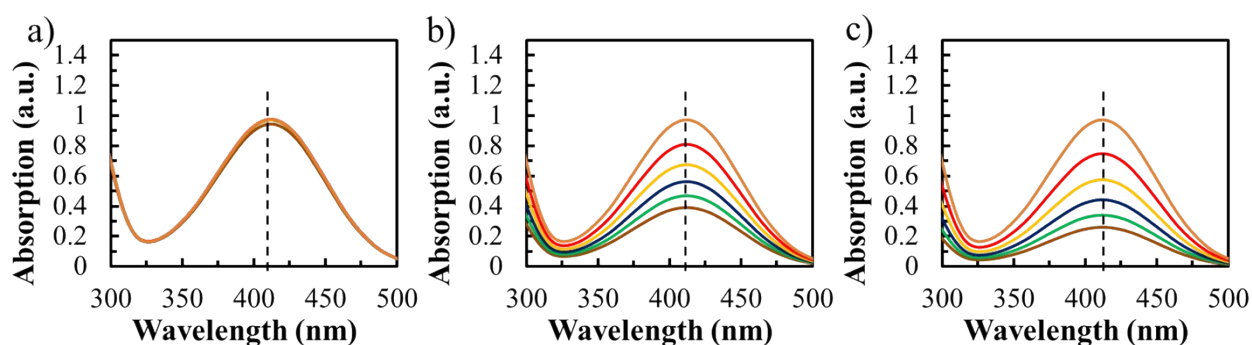

**Fig. S14.** UV-vis spectra of 2-nitroaniline (412 nm) degraded by (a) W-EA, (b) g-C<sub>3</sub>N<sub>4</sub> and W-EA-CN.

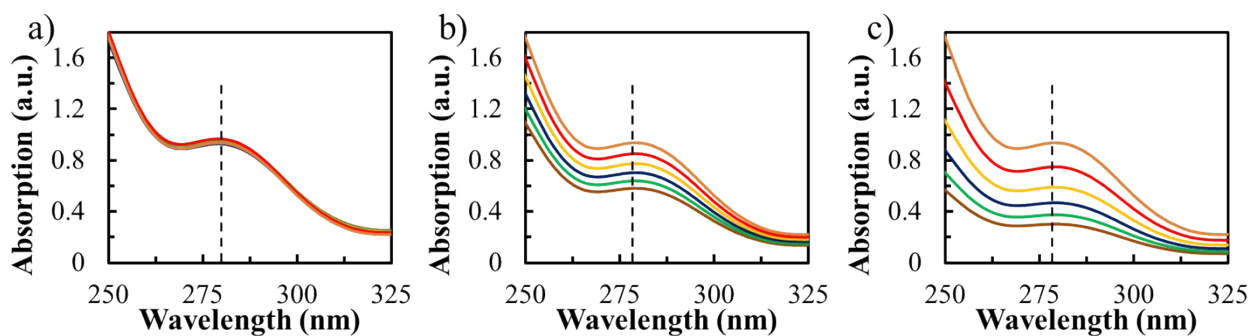

**Fig. S15.** UV-vis spectra of 3-nitroaniline (279 nm) degraded by (a) W-EA, (b) g-C<sub>3</sub>N<sub>4</sub> and W-EA-CN.

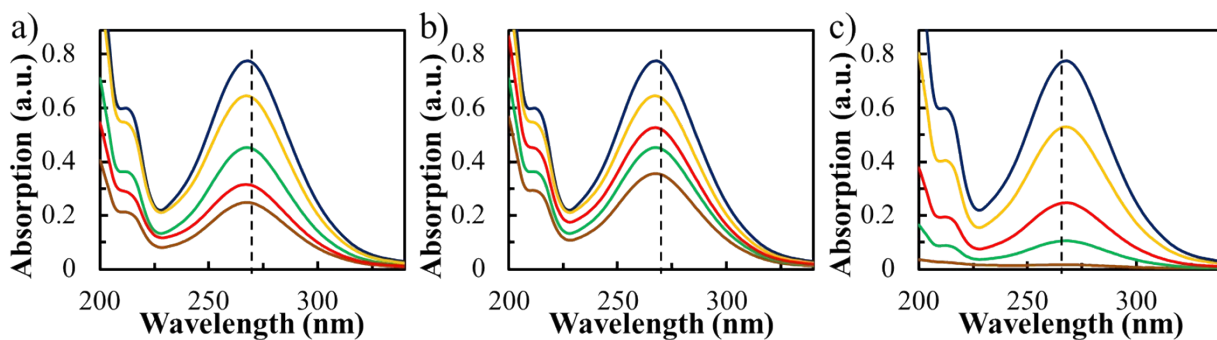

**Fig. S16.** UV-vis spectra of nitrobenzene (268 nm) degraded by (a) W-EA, (b) g-C<sub>3</sub>N<sub>4</sub> and W-EA-CN.

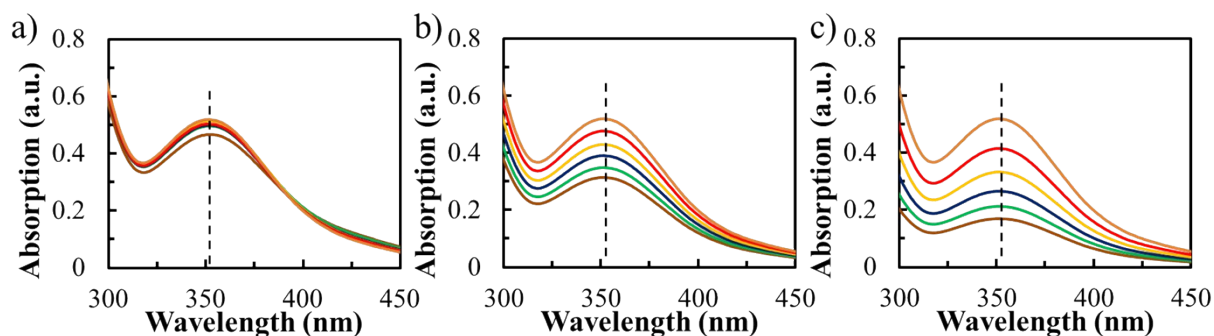

**Fig. S17.** UV-vis spectra of 2-nitrophenol (352 nm) degraded by (a) W-EA, (b) g-C<sub>3</sub>N<sub>4</sub> and W-EA-CN.

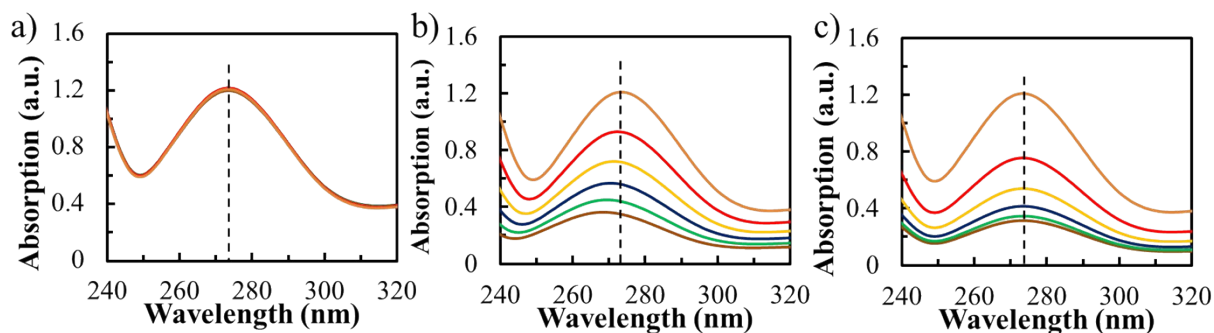

**Fig. S18.** UV-vis spectra of 3-nitrophenol (272 nm) degraded by (a) W-EA, (b) g-C<sub>3</sub>N<sub>4</sub> and W-EA-CN.

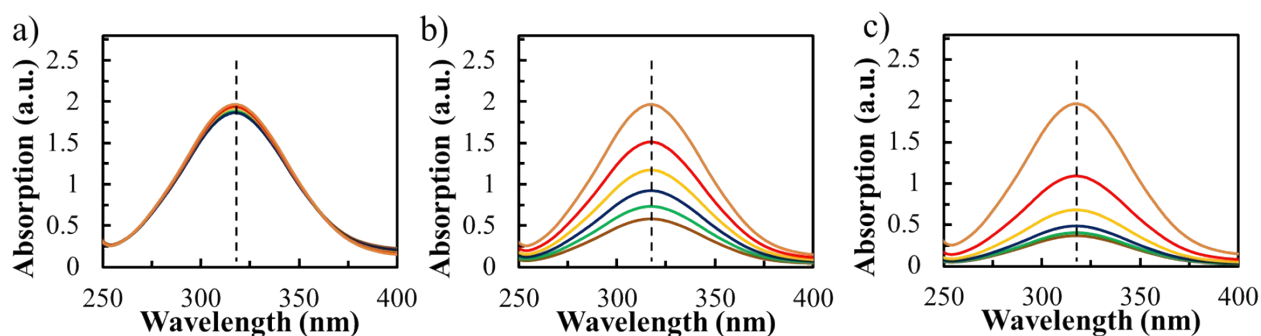

**Fig. S19.** UV-vis spectra of 4-nitrophenol (317 nm) degraded by (a) W-EA, (b) g-C<sub>3</sub>N<sub>4</sub> and W-EA-CN.

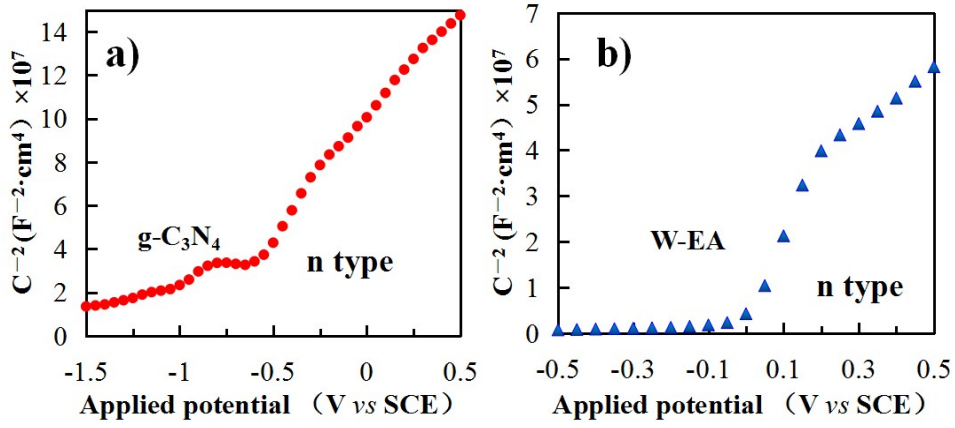

**Fig. S20.** Mott–Schottky results of (a) g-C<sub>3</sub>N<sub>4</sub> and (b) W-EA.

### Appendix: bandgap energy calculation

The bandgap energy of the photocatalysts is calculated based on the following equations <sup>7, 8</sup>:

$$\alpha h\nu = A(h\nu - E_g)^{n/2} \quad (1)$$

where  $h$ ,  $\nu$ ,  $A$ , and  $E_g$  are absorption coefficient, Planck constant, light frequency, proportionality and bandgap energy, respectively.

The band edge positions of CB and VB for semiconductors can be determined by the following equations:

$$E_{VB} = X - E_e + 0.5E_g \quad (2)$$

$$E_{CB} = E_{VB} - E_g \quad (3)$$

where  $X$  is the absolute electronegativity of the semiconductor,  $X$  are 4.73 and 6.49 eV for g-C<sub>3</sub>N<sub>4</sub> and WO<sub>3</sub> and  $E_e$  is the energy of free electrons on the hydrogen scale (ca. 4.5 eV).

## References

1. K. Katsumata, R. Motoyoshi, N. Matsushita and K. Okada, *J. Hazard. Mater.*, 2013, **260**, 475-482.
2. J. Li, H. Hao and Z. Zhu, *Mater. Lett.*, 2016, **168**, 180-183.
3. Z. W. Zhao, Y. J. Sun and F. Dong, *Nanoscale*, 2015, **7**, 15-37.
4. Y. Zheng, L. H. Lin, B. Wang and X. C. Wang, *Angew. Chem. Int. Ed.*, 2015, **54**, 12868-12884.
5. S. W. Cao, J. X. Low, J. G. Yu and M. Jaroniec, *Adv. Mater.*, 2015, **27**, 2150-2176.
6. J. J. Zhu, P. Xiao, H. L. Li and S. A. C. Carabineiro, *Acs Appl. Mater. Interfaces*, 2014, **6**, 16449-16465.
7. S.F. Chen, Y.F. Hu, S.G. Meng, X.L. Fu, *Appl. Catal. B-Environ.*, 2014, **150**, 564-573.
8. H.F. Li, H.T. Yu, X. Quan, S. Chen, Y.B. Zhang, *Acs Appl. Mater. Interfaces*, 2016, **8**, 2111-2119.
